# Supplementary material for: Epstein–Barr Virus Prevalence at Diagnosis and Seroconversion during Follow-Up in Pediatric Inflammatory Bowel Disease
Source: MDPI journal article supplement (doi:10.3390/jcm10215187), 2021-11-06

# Supplementary materials

**Supplemental Table S1.** Characteristics of all patients with at any time point available Epstein-Barr virus (EBV) serology (N=207). Results are represented in mean and standard deviation (SD) or median and interquartile range (IQR).

| <b>Supplemental Table 1</b> Characteristics of all patients with available EBV serology at any time point (N=207 of a total of 402) |                             |                             |                            |                |  |
|-------------------------------------------------------------------------------------------------------------------------------------|-----------------------------|-----------------------------|----------------------------|----------------|--|
| <b>Factors</b>                                                                                                                      | <b>All patients (n=207)</b> | <b>EBV positive (n=110)</b> | <b>EBV negative (n=97)</b> | <b>P-value</b> |  |
| <b>Males, n (%)</b>                                                                                                                 | 115 (55.6)                  | 64 (58.2)                   | 51 (52.6)                  | 0.418*         |  |
| <b>Age at EBV testing</b>                                                                                                           |                             |                             |                            |                |  |
| Mean (SD)                                                                                                                           | 11.4 (4.0)                  | 12.2 (3.7)                  | 10.4 (4.2)                 | 0.001**        |  |
| Median (IQR)                                                                                                                        | 12.0 (9.0-14.0)             | 13.0 (10.0-15.0)            | 11.0 (8.0-14.0)            | 0.006**        |  |
| <b>Age groups, n (%)</b>                                                                                                            |                             |                             |                            | 0.018*         |  |
| 0-9 years                                                                                                                           | 61 (29.5)                   | 24 (21.8)                   | 37 (38.1)                  |                |  |
| 9-13 years                                                                                                                          | 67 (32.4)                   | 36 (32.7)                   | 31 (32.0)                  |                |  |
| 13-18 years                                                                                                                         | 79 (38.1)                   | 50 (45.5)                   | 29 (29.9)                  |                |  |
| <b>Diagnosis, n (%)</b>                                                                                                             |                             |                             |                            | 0.872*         |  |
| Ulcerative colitis                                                                                                                  | 84 (40.6)                   | 45 (40.9)                   | 39 (40.2)                  |                |  |
| Crohn's disease                                                                                                                     | 110 (53.1)                  | 59 (53.6)                   | 51 (52.6)                  |                |  |
| IBD-undefined                                                                                                                       | 13 (6.3)                    | 6 (5.5)                     | 7 (7.2)                    |                |  |

\*P-values refer to the comparison between EBV positive group and EBV negative group obtained by the Pearson's Chi-square test.

\*\* P-values obtained from the Wilcoxon rank-sum test.

**Supplemental Table S2.** Characteristics of all patients with inflammatory bowel disease (IBD) in our cohort (N= 402). Results are represented in mean and standard deviation (SD) or median and interquartile range (IQR).

| Supplemental Table S2 Characteristics of all patients with IBD in our cohort (N= 402) |                         |                                    |                                    |                |
|---------------------------------------------------------------------------------------|-------------------------|------------------------------------|------------------------------------|----------------|
| Factors                                                                               | All patients<br>(n=402) | EBV status<br>available<br>(n=207) | No EBV status available<br>(n=195) | P-value        |
| <b>Males, n (%)</b>                                                                   | 226 (56.2)              | 115 (55.6)                         | 111 (56.9)                         | 0.782*         |
| <b>Age at IBD diagnosis</b>                                                           |                         |                                    |                                    |                |
| Mean (SD)                                                                             | 11.0 (4.0)              | 11.1 (4.0)                         | 11.0 (4.0)                         | <b>0.464**</b> |
| Median (IQR)                                                                          | 12.0 (9.0-14.0)         | 12.0 (9.0-14.0)                    | 12.0 (9.0-14.0)                    | <b>0.237**</b> |
| <b>Age groups, n (%)</b>                                                              |                         |                                    |                                    | <b>0.183*</b>  |
| 0-9 years                                                                             | 124 (30.9)              | 65 (31.4)                          | 59 (30.3)                          |                |
| 9-13 years                                                                            | 148 (36.8)              | 68 (32.9)                          | 80 (41.0)                          |                |
| 13-18 years                                                                           | 130 (32.3)              | 74 (35.7)                          | 56 (28.7)                          |                |
| <b>Diagnosis, n (%)</b>                                                               |                         |                                    |                                    | 0.275*         |
| Ulcerative colitis                                                                    | 153 (38.1)              | 84 (40.6)                          | 69 (35.4)                          |                |
| Crohn's disease                                                                       | 228 (56.7)              | 110 (53.1)                         | 118 (60.5)                         |                |
| IBD-unclassified                                                                      | 21 (5.2)                | 13 (6.3)                           | 8 (4.1)                            |                |

\*P-values refer to the comparison between EBV positive group and EBV negative group obtained by the Pearson's Chi-square test.

\*\* P-values obtained from the Wilcoxon rank-sum test.

**Supplemental Table S3.** Characteristics of patients with available follow up Epstein-Barr virus (EBV) serology (N=66). Results are represented in mean and standard deviation (SD) or median and interquartile range (IQR).

| <b>Supplemental Table 3</b> Characteristics of patients with available follow up EBV serology (N=66) |                                    |                                    |                                    |                     |
|------------------------------------------------------------------------------------------------------|------------------------------------|------------------------------------|------------------------------------|---------------------|
| <b>Factors</b>                                                                                       | <b>All patients (N=66) No. (%)</b> | <b>EBV positive (n=11) No. (%)</b> | <b>EBV negative (n=55) No. (%)</b> | <b>P-value</b>      |
| <b>Males, n (%)</b>                                                                                  | 32 (48.5)                          | 6 (54.5)                           | 26 (47.3)                          | 0.748 <sup>b)</sup> |
| <b>Age</b>                                                                                           |                                    |                                    |                                    |                     |
| Mean (SD)                                                                                            | 14.5 (4.1)                         | 13.9 (4.5)                         | 14.7 (4.0)                         | 0.903 <sup>c)</sup> |
| Median (IQR)                                                                                         | 15.5 (13.0-17.0)                   | 16.0 (9.0-17.0)                    | 15.0 (13.0-17.0)                   | 0.743 <sup>d)</sup> |
| <b>Age groups <sup>a)</sup></b>                                                                      |                                    |                                    |                                    | 0.223 <sup>b)</sup> |
| 0-13 years                                                                                           | 20 (30.3)                          | 4 (36.4)                           | 16 (29.1)                          |                     |
| 13-16 years                                                                                          | 27 (40.9)                          | 2 (18.2)                           | 25 (45.5)                          |                     |
| 16-25 years                                                                                          | 19 (28.8)                          | 5 (45.5)                           | 14 (25.5)                          |                     |
| <b>Follow up time Mean (SD)</b>                                                                      | 4.3 (3.0)                          | 5.0 (4.2)                          | 4.2 (2.8)                          | 0.951 <sup>c)</sup> |
| <b>Diagnosis</b>                                                                                     |                                    |                                    |                                    | 0.613 <sup>b)</sup> |
| Ulcerative colitis                                                                                   | 27 (40.9)                          | 4 (36.4)                           | 23 (41.8)                          |                     |
| Crohn's disease                                                                                      | 36 (54.5)                          | 6 (54.5)                           | 30 (54.5)                          |                     |
| IBD-unclassified                                                                                     | 3 (4.5)                            | 1 (9.1)                            | 2 (3.6)                            |                     |
| <b>Therapies</b>                                                                                     |                                    |                                    |                                    |                     |
| Biologicals                                                                                          | 50 (75.8)                          | 7 (63.6)                           | 43 (78.2)                          | 0.440 <sup>b)</sup> |
| Thiopurines                                                                                          | 31 (47.0)                          | 8 (72.7)                           | 23 (41.8)                          | 0.097 <sup>b)</sup> |
| Methotrexate                                                                                         | 18 (27.3)                          | 1 (9.1)                            | 17 (30.9)                          | 0.265 <sup>b)</sup> |
| Combotherapy                                                                                         | 24 (36.4)                          | 4 (36.4)                           | 20 (36.4)                          | 1.000 <sup>b)</sup> |
| * 5-aminosalicylic acid                                                                              | 41 (62.1)                          | 8 (72.7)                           | 33 (60.0)                          | 0.513 <sup>b)</sup> |

a) We considered the cut-offs according to the 1. Quartile and median age in the longitudinal cohort.

b) P-values refer to comparison between EBV positive and EBV negative group obtained by the Fisher's Exact Test.

c) P-values obtained from Wilcoxon-Mann-Whitney test (Wilcoxon rank sum test).

d) P-values applied from Median test.

\* Combination therapy of a biological and methotrexate or thiopurines.

**Supplemental Figure S1.** Flow chart of study population.

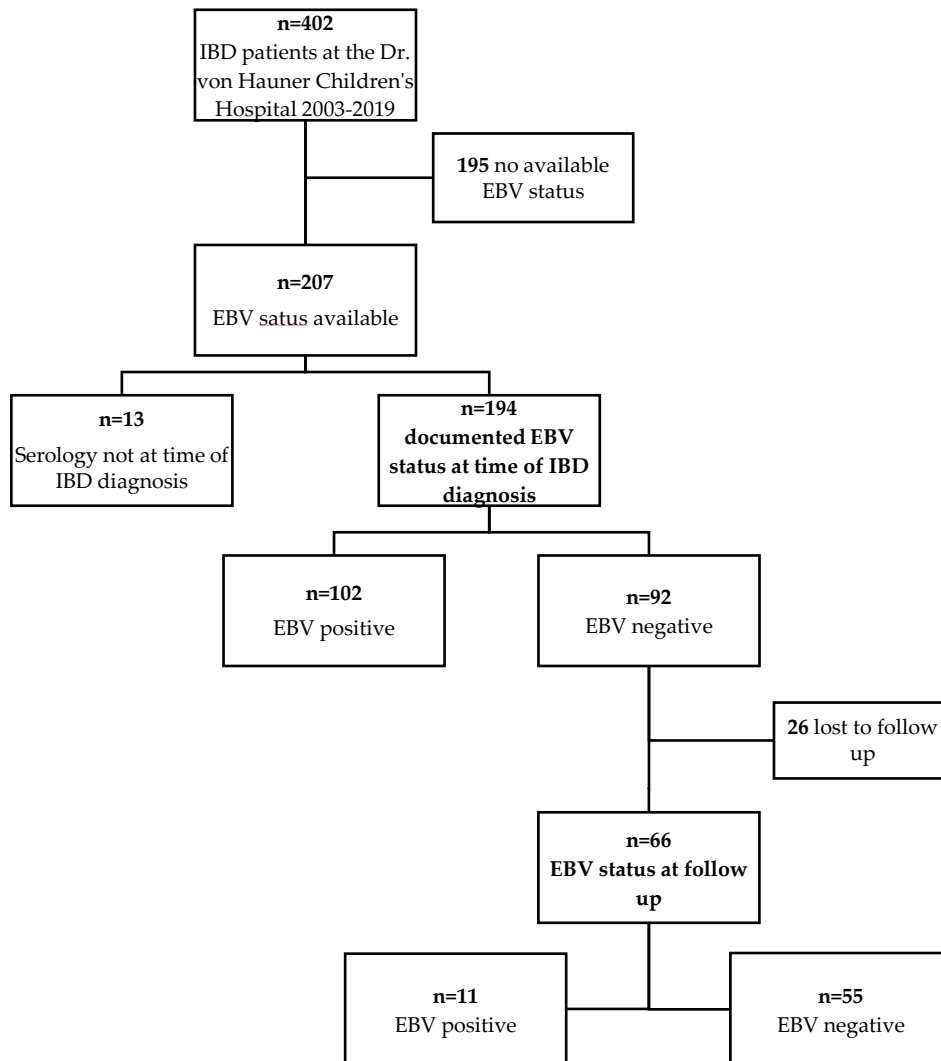

**Supplemental Figure S2.** Box plot for age at first inflammatory bowel disease (IBD) diagnosis by Epstein-Barr virus (EBV) status (N=194),  $p=0.005$ .

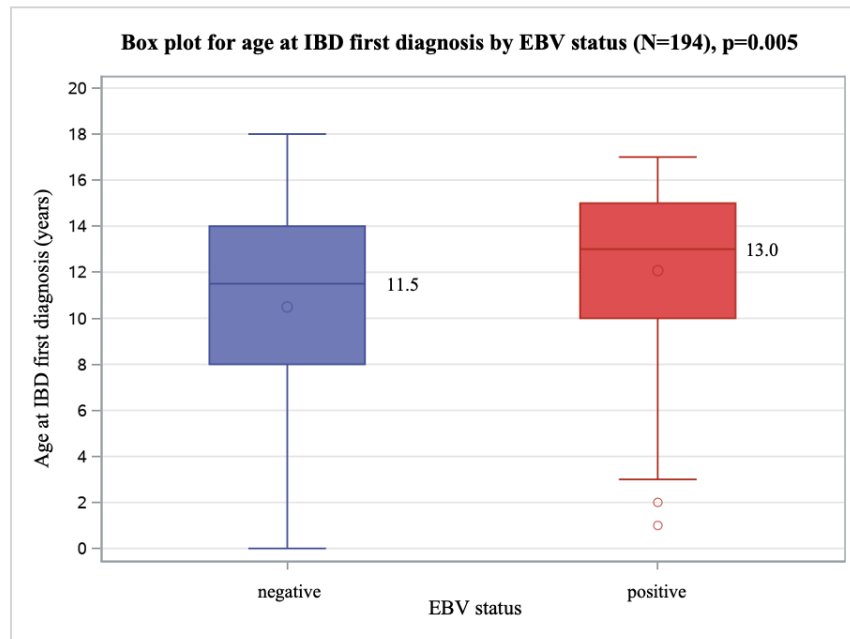

Supplement: s1 [file s1]
